# Supplementary material for: Cytochalasin-B-Inducible Nanovesicle Mimics of Natural Extracellular Vesicles That Are Capable of Nucleic Acid Transfer
Source: Micromachines (Basel). 2019 Nov 1;10(11):750. doi: 10.3390/mi10110750 (PMC6915531; doi:10.3390/mi10110750)
Supplement: Supplementary file 1 [file micromachines-10-00750-s001.pdf]

## Supporting Information

# Cytochalasin-B-Inducible Nanovesicle Mimics of Natural Extracellular Vesicles That Are Capable of Nucleic Acid Transfer

Anastasiya Oshchepkova <sup>1</sup>, Alexandra Neumestova <sup>1</sup>, Vera Matveeva <sup>1</sup>, Lyudmila Artemyeva <sup>1</sup>, Ksenia Morozova <sup>2</sup>, Elena Kiseleva <sup>2</sup>, Marina Zenkova <sup>1,\*</sup> and Valentin Vlassov <sup>1</sup>

<sup>1</sup> Institute of Chemical Biology and Fundamental Medicine SB RAS, Novosibirsk 630090, Russia; niboch@niboch.nsc.ru

<sup>2</sup> Institute of Cytology and Genetics SB RAS, Novosibirsk 630090, Russia; icg-adm@bionet.nsc.ru

\* Correspondence: marzen@niboch.nsc.ru, +7 (383) 363-51-60

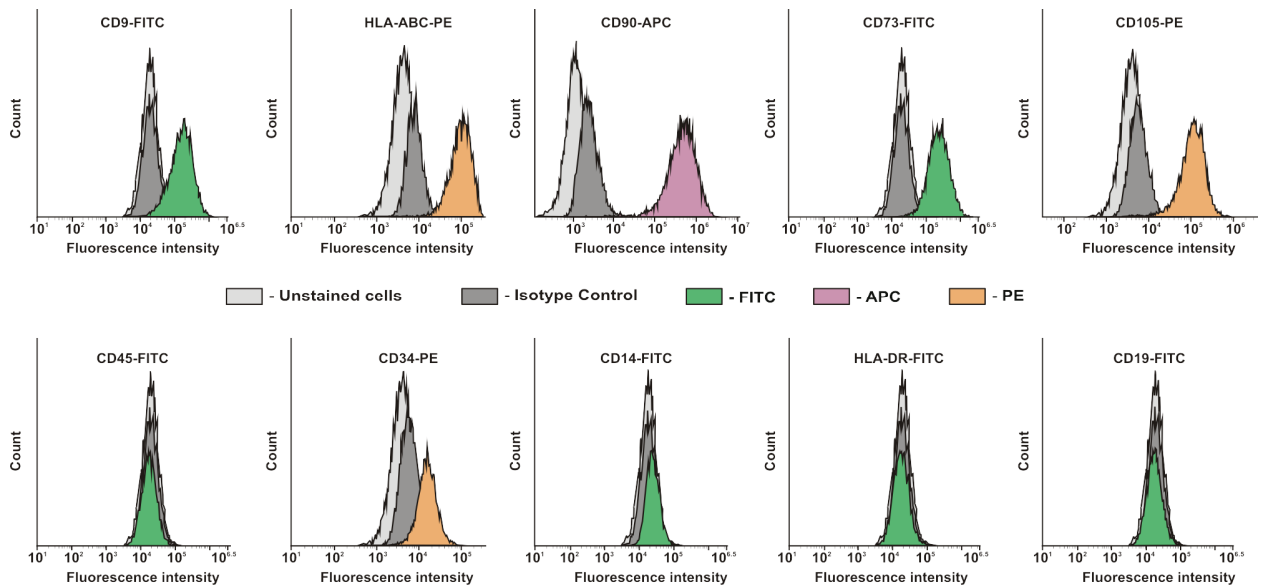

**Figure S1.** The phenotype of human mesenchymal stem cells (MSCs) derived from the endometrial functional layer. Data indicate flow cytometry analysis.

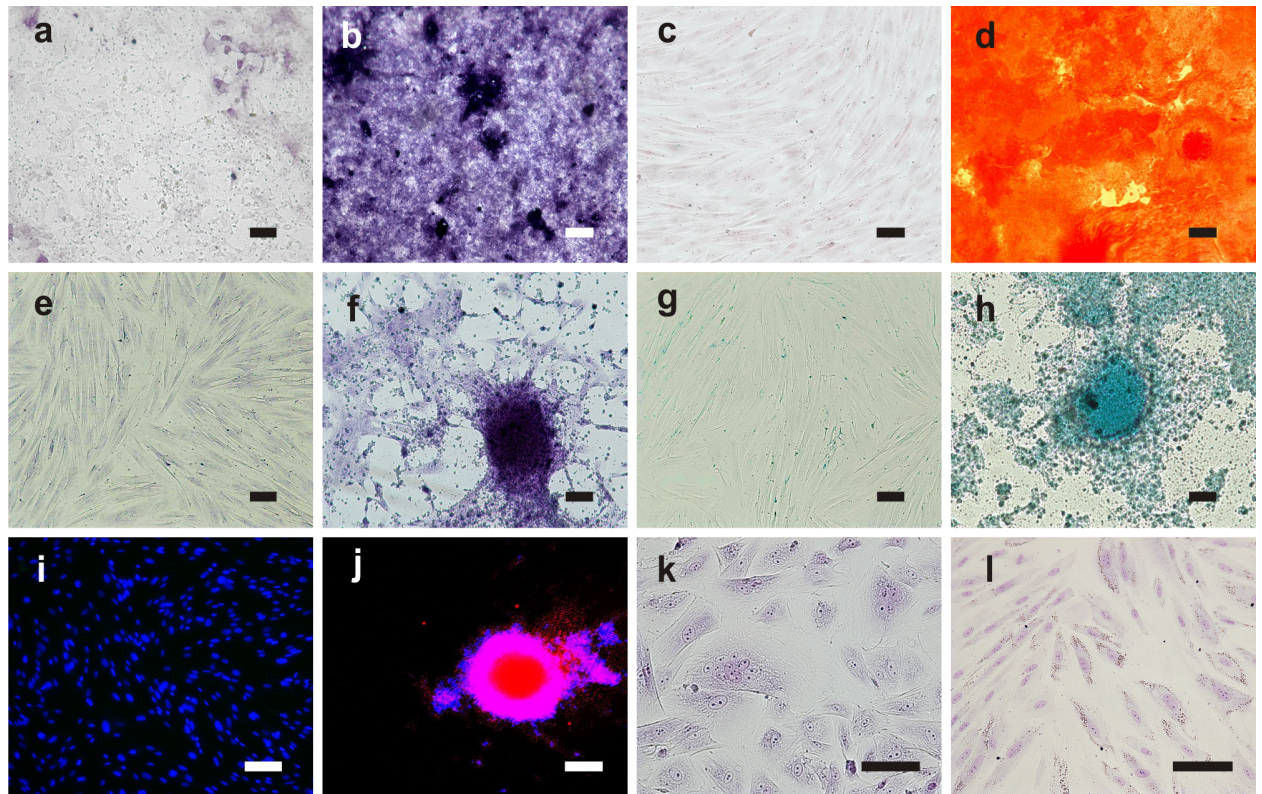

**Figure S2.** MSC differentiation. (a-d) Osteo-differentiation, (e-j) chondro-differentiation (intercellular matrix), and (k-l) adipo-differentiation. (a,b) Cells stained with Nitroterazolium Blue; (c,d) calcium staining with Alizarin Red S; (e,f) staining of acidic glycosaminoglycans with Toluidine Blue; (g,h) staining of sulfated glycosaminoglycans with Alcian Blue; (i,j) staining of collagen II with specific antibodies labeled with Cy 3.5 (nucleus stained with DAPI); (k,l) staining of lipid droplets with Oil Red O. Micrographs in (a,c,e,g,i,k) represent non-induced (control) cells and (b,d,f,h,j,l) show induced cells. Scale bar = 100  $\mu$ m.

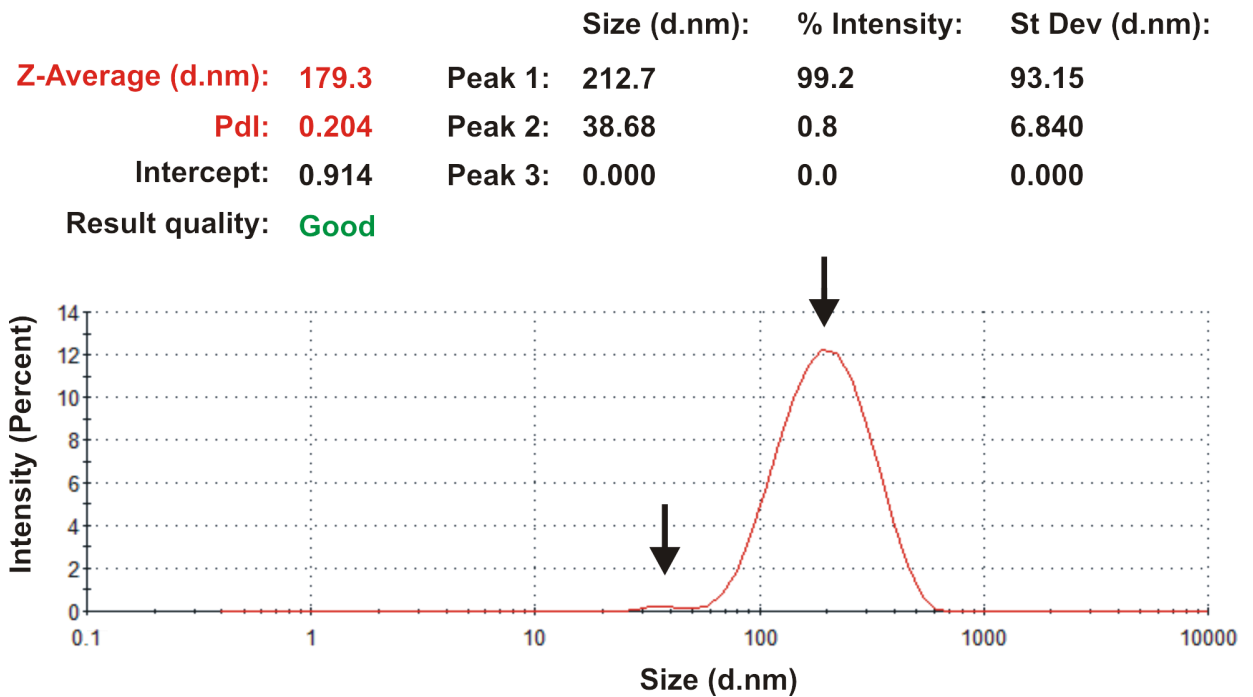

**Figure S3.** DLS data for natural extracellular vesicles (EVs). Peak 2 corresponds to a group of small particles detected in several samples.

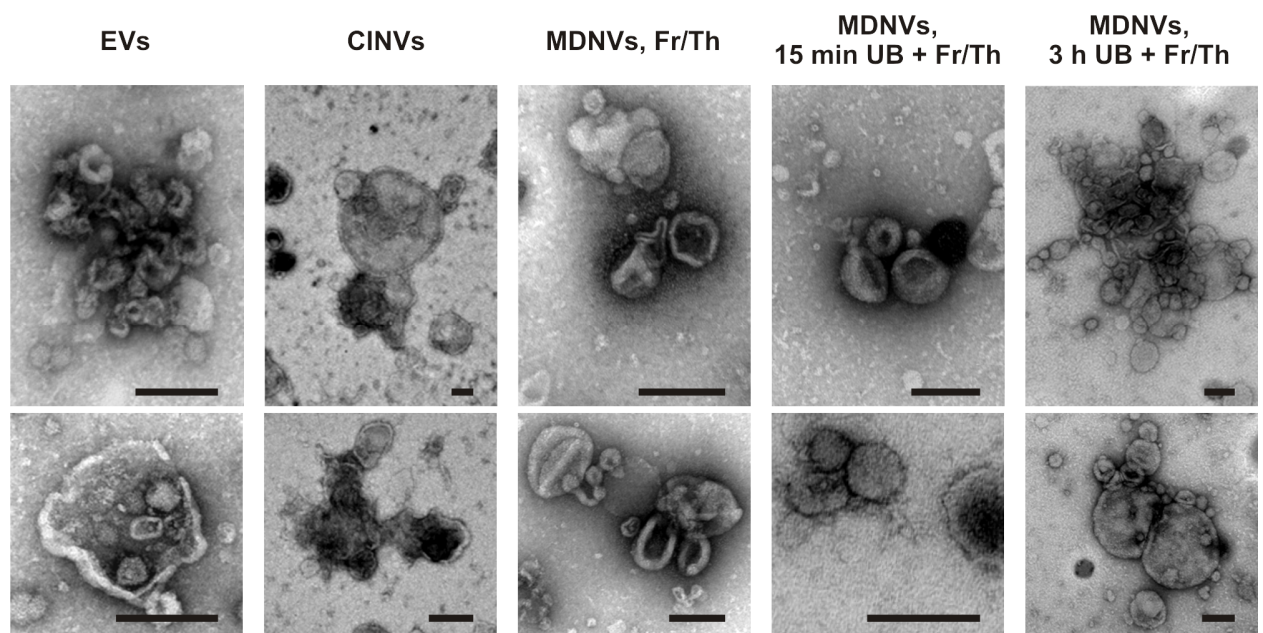

**Figure S4.** Aggregates presented in preparations of natural EVs and artificial mimics. TEM analysis. Scale bar = 100 nm.

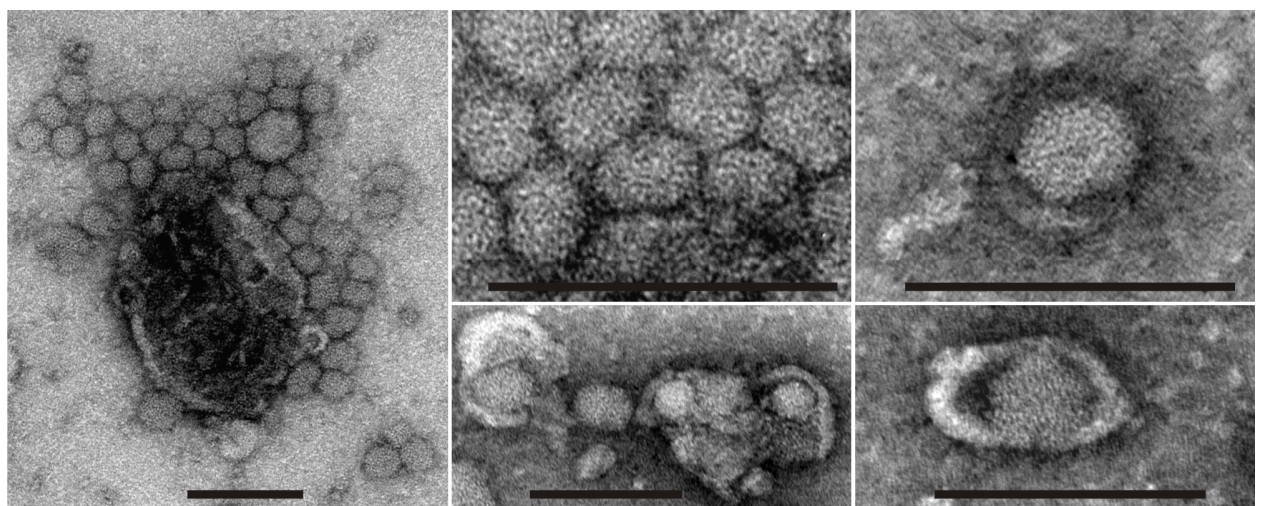

**Figure S5.** Virus-like particles in human endometrial MCS-derived membrane-derived nanovesicles (MDNVs). Transmission electron micrographs of non-membrane particles that form colonies or are surrounded by fragments of plasma membrane. The MDNVs were generated by 3 h UB followed by Fr/Th. Scale bar = 100 nm.

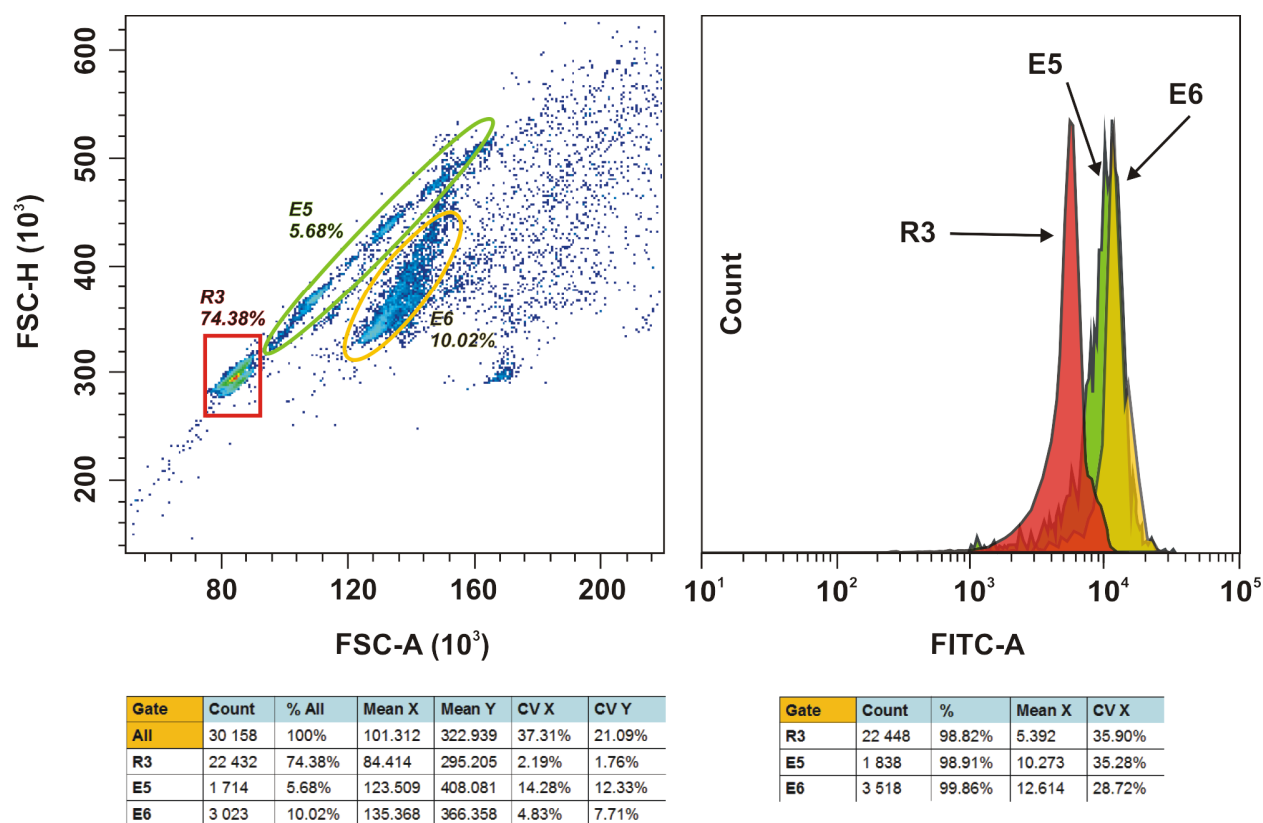

**Figure S6.** Latex bead doublet discrimination. EVs were immobilized on 4  $\mu\text{m}$  aldehyde/sulfate latex and stained with CD9-FITC conjugate. The R3 region was chosen to detect fluorescence intensity in all further experiments. E5 and E6 regions that corresponded to bead doublet were excluded from the analysis.

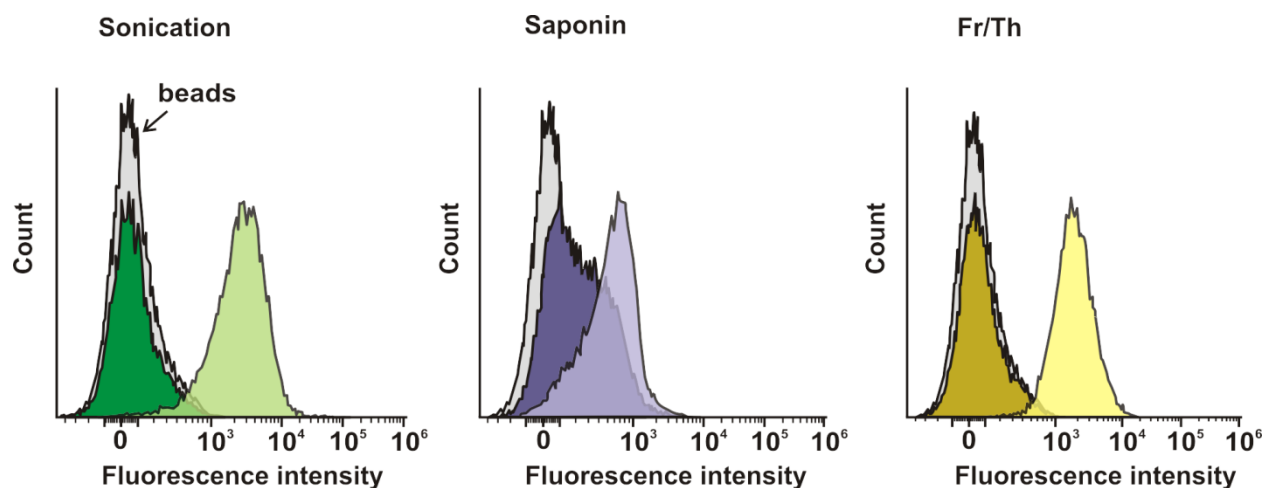

**Figure S7.** Ultracentrifugation affects the yield of EVs loaded with FAM-ON. HepG2-derived EVs were loaded with FAM-ON under standard conditions (15  $\mu\text{g}$  EVs were mixed with 5  $\mu\text{M}$  FAM-ON in 200  $\mu\text{L}$  TBS) by sonication, permeabilization with 0.2% saponin, or Fr/Th. EV-FAM-ON complexes were immobilized on 4  $\mu\text{m}$  aldehyde/sulfate latex beads either immediately after loading (light colors) or after re-precipitation by ultracentrifugation (dark colors). Sixty-to-eighty percent of latex beads contained EV-FAM-ON complexes after sonication or Fr/Th and  $\approx 10\%$  after saponin treatment in the absence of ultracentrifugation. This amount was reduced to  $\approx 1\%$  for sonication and Fr/Th and did not change for saponin after vesicle re-precipitation by ultracentrifugation. Fluorescent signal was not detected for sonication and Fr/Th after ultracentrifugation, data that indicate a massive loss of nanovesicles.

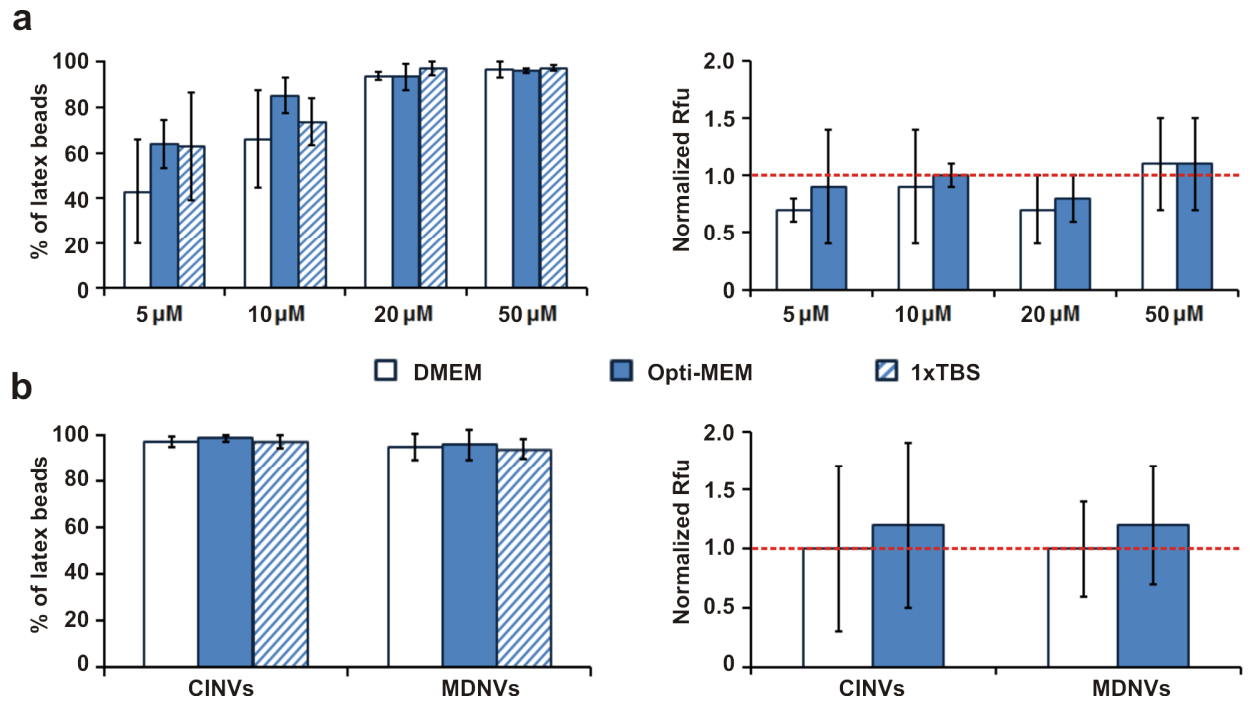

**Figure S8.** FAM-ON loading in buffering system and culture mediums. Loading 15  $\mu\text{g}$  EVs, cytochalasin-B-inducible nanovesicles (CINVs), or MDNVs was performed by Fr/Th. FAM-ON concentrations were from 5 to 50  $\mu\text{M}$  for EVs and 50  $\mu\text{M}$  for CINVs and MDNVs. (a) EVs. (b) CINVs and MDNVs. Rfu level observed in TBS was set at 1 and is shown as the red dashed line.
